# Supplementary material for: Exposing the photocorrosion mechanism and control strategies of a CuO photocathode
Source: Royal Society of Chemistry journal article supplement (doi:10.1039/c9qi00780f), 2019-01-01
Supplement: c9qi00780f1.pdf [file c9qi00780f1.pdf]

**Supplemental Informations:**

Fig. S1 Photocurrent density-voltage curves of bare CuO with different electrodeposition time

Fig. S2 XPS spectra of Cu 2p before photocorrosion stability test

Fig. S3 XRD pattern (a) XPS spectra of Ti 2p (b) of CuO/TiO<sub>2</sub>

Fig. S4 UV-Vis absorbance spectra of CuO and CuO/TiO<sub>2</sub>

Fig. S5 Top-view SEM image of CuO/Pt (a) and corresponding elemental mapping images of Cu, O and Pt of CuO/Pt (b)

Fig. S6 XRD pattern of CuO/Pt (a) UV-Vis absorbance spectra of CuO and CuO/Pt (b)

Fig. S7 XRD pattern of CuO as well as CuO/TiO<sub>2</sub>/Pt photocathode before and after stability test

Fig. S8 XPS spectra of (a) Cu 2p; XPS deconvoluted spectrum of (b) Cu 2p<sub>1/2</sub>, (c) Cu 2p<sub>3/2</sub> after photocorrosion stability test

Fig. S9 Nyquist plots measured at -0.55 V vs. Ag/AgCl of CuO, CuO/TiO<sub>2</sub>, CuO/Pt and CuO/TiO<sub>2</sub>/Pt composite photocathodes

Fig. S10 Schematic illustration of charge separation and transfer of the CuO/TiO<sub>2</sub>/Pt composite photocathode in the process of PEC water splitting

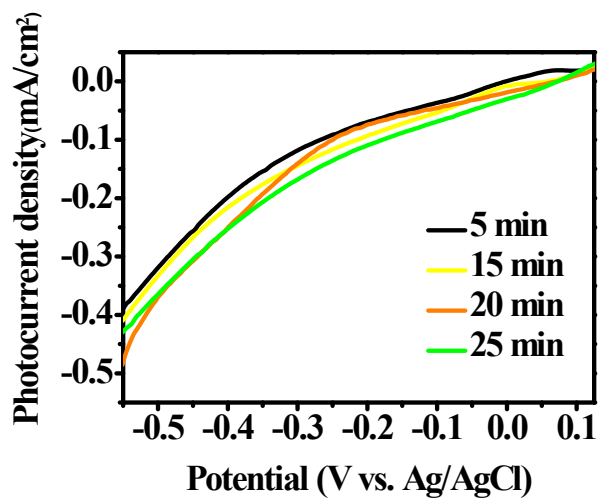

Fig. S1 Photocurrent density-voltage curves of bare CuO with different electrodeposition time

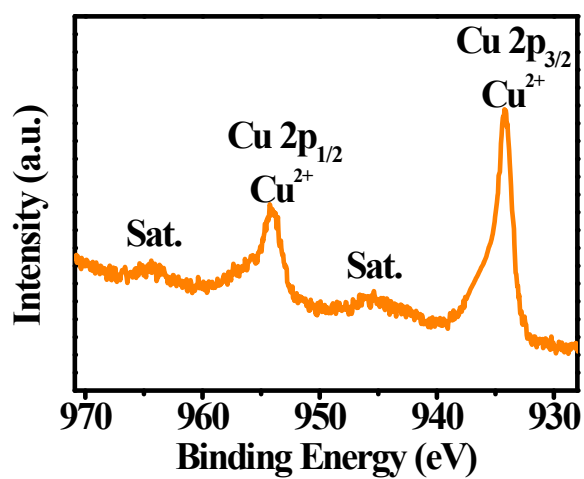

Fig. S2 XPS spectra of Cu 2p before photocorrosion stability test

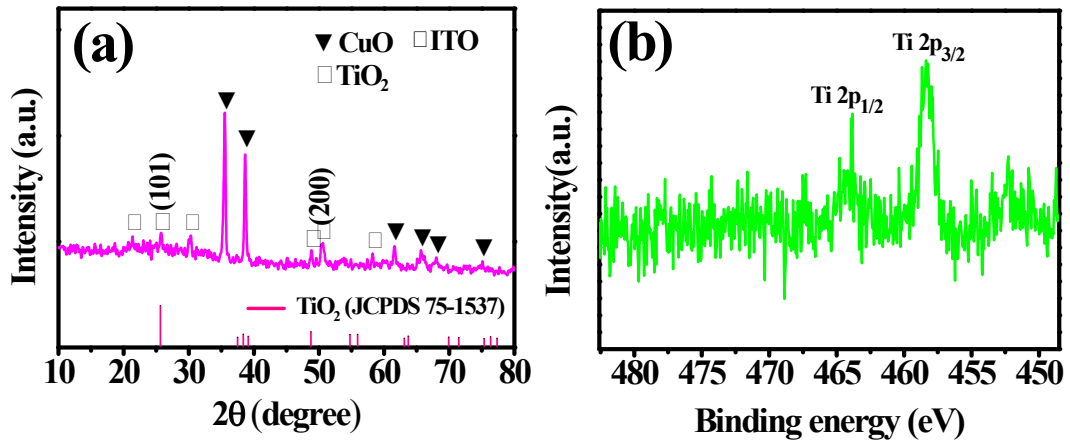

Fig. S3 XRD pattern (a) XPS spectra of Ti 2p (b) of CuO/TiO<sub>2</sub>

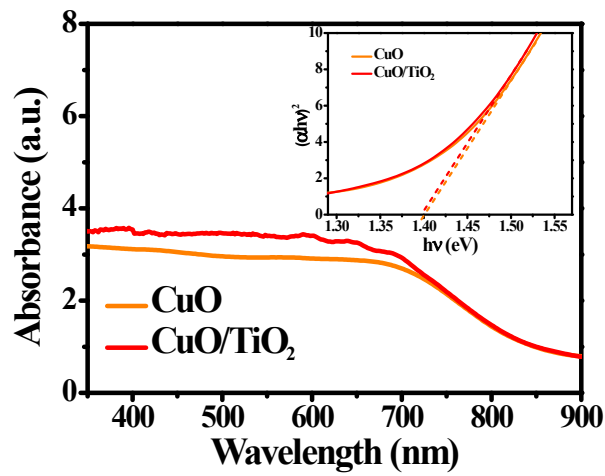

Fig. S4 UV-Vis absorbance spectra of CuO and CuO/TiO<sub>2</sub>

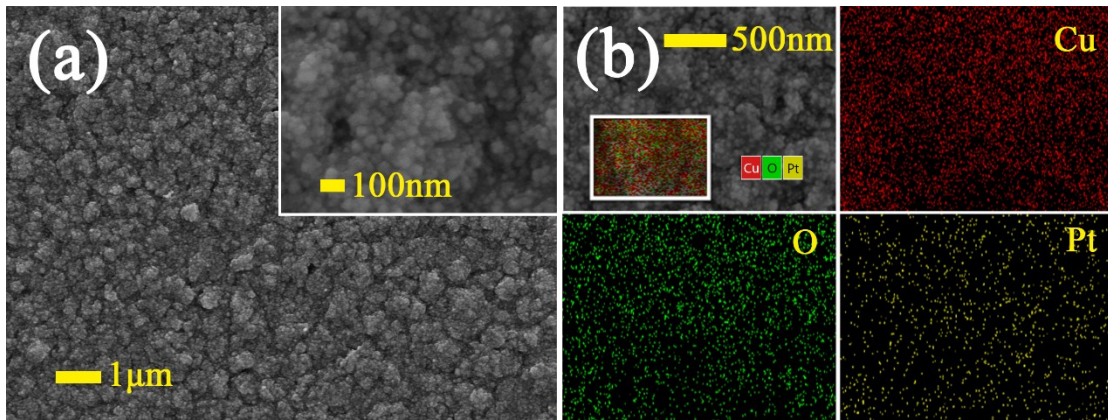

Fig. S5 Top-view SEM image of CuO/Pt (a) and corresponding elemental mapping images of Cu, O and Pt of CuO/Pt (b)

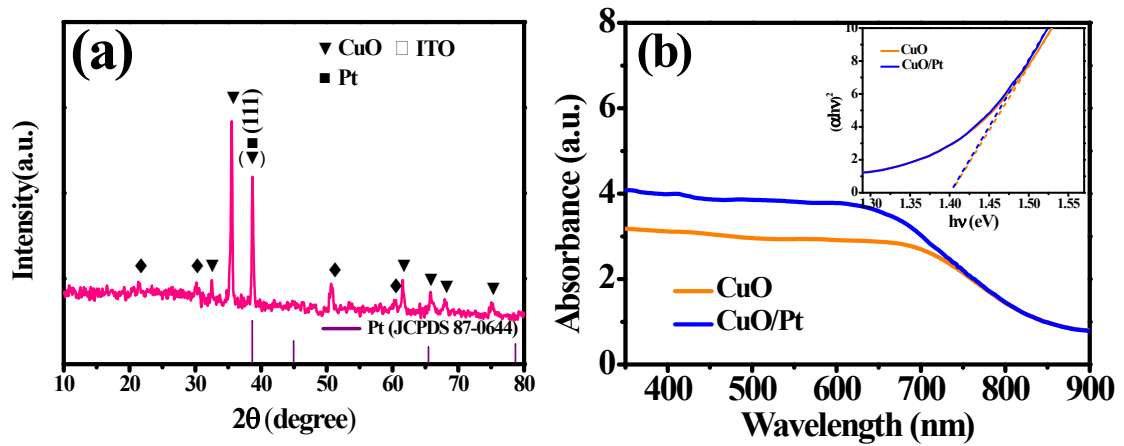

Fig. S6 XRD pattern of CuO/Pt (a) UV-Vis absorbance spectra of CuO and CuO/Pt (b)

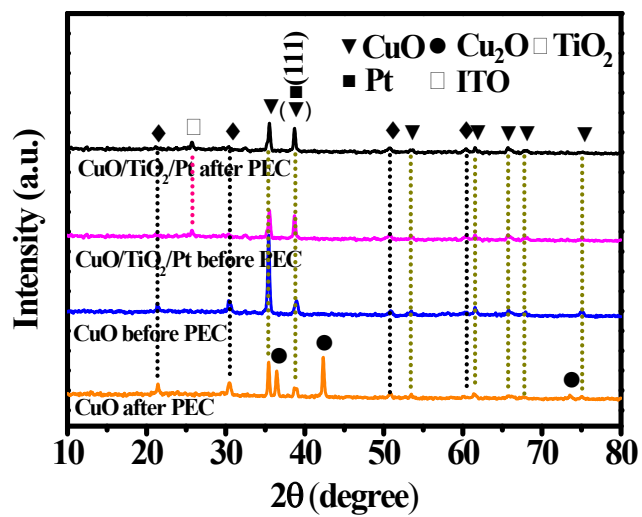

Fig. S7 XRD pattern of CuO as well as CuO/TiO<sub>2</sub>/Pt photocathode before and after stability test

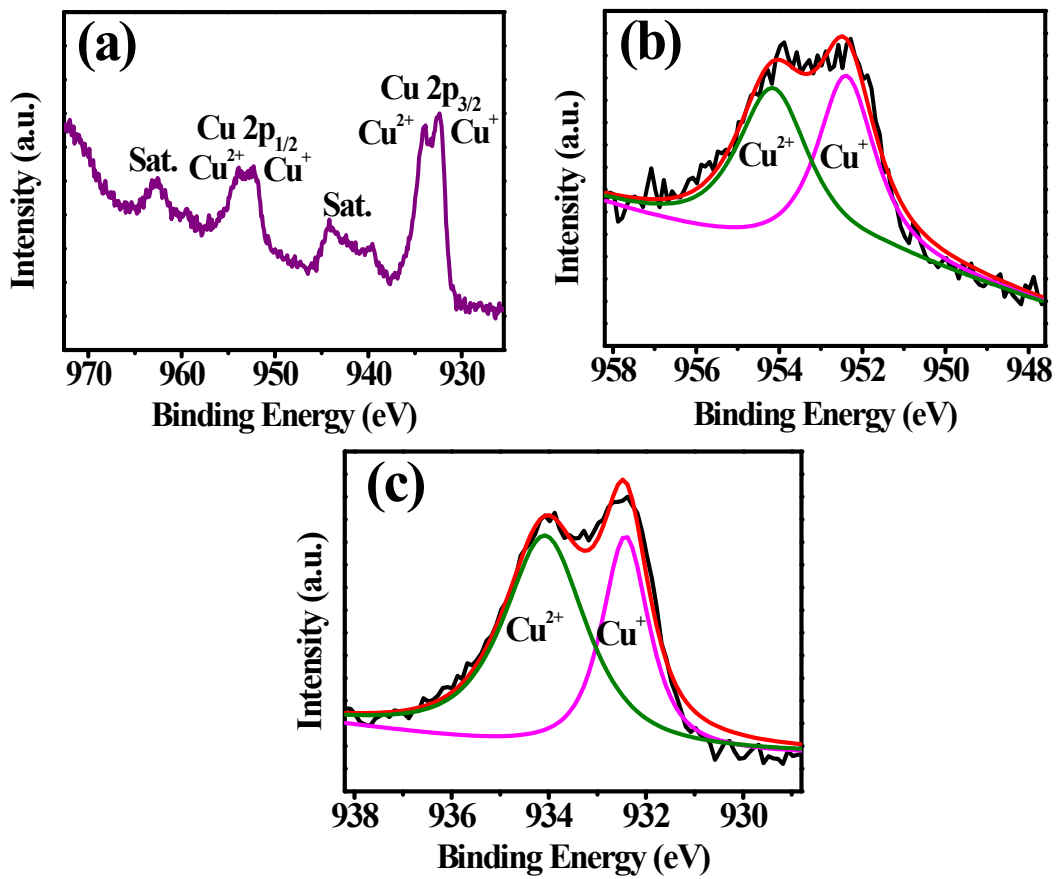

Fig. S8 XPS spectra of (a) Cu 2p; XPS deconvoluted spectrum of (b) Cu 2p<sub>1/2</sub>, (c) Cu 2p<sub>3/2</sub> after photocorrosion stability test

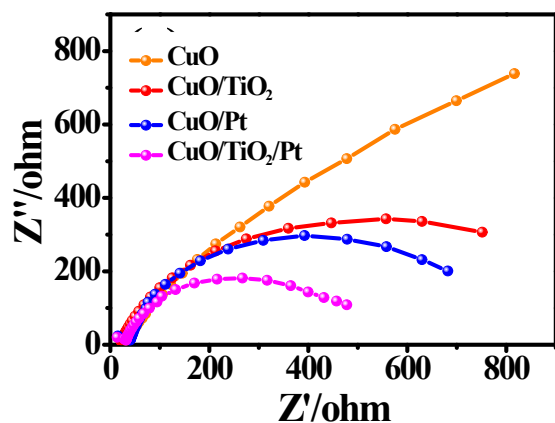

Fig. S9 Nyquist plots measured at -0.55 V vs. Ag/AgCl of CuO, CuO/TiO<sub>2</sub>, CuO/Pt and CuO/TiO<sub>2</sub>/Pt composite photocathodes

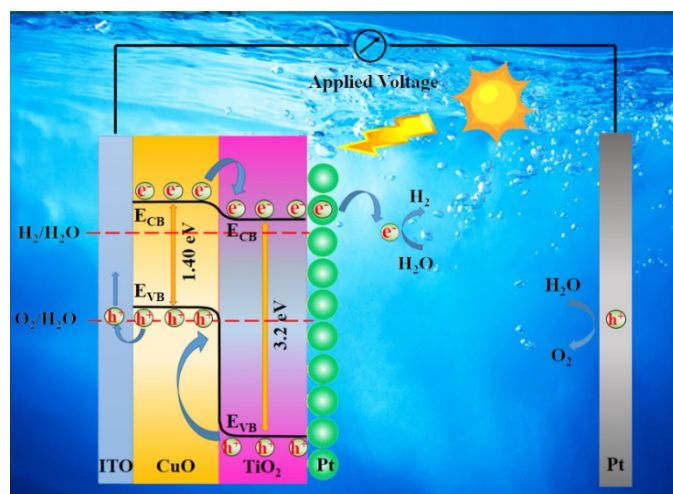

Fig. S10 Schematic illustration of charge separation and transfer of the CuO/TiO<sub>2</sub>/Pt composite photocathode in the process of PEC water splitting
